1           **Reduced production of the major allergen Bla g 1 and Bla g 2 in *Blattella***  
2                                           ***germanica* after antibiotic treatment**

3  
4   Running title: Antibiotics lower Bla g 2 levels in *B. germanica*

5  
6   Seogwon LEE<sup>1</sup>, Ju Yeong KIM<sup>1</sup>, Myung-hee YI<sup>1</sup>, In-Yong LEE<sup>1,2</sup>, Dongeun YONG<sup>3</sup>, Tai-  
7   Soon YONG<sup>1\*</sup>

8  
9   <sup>1</sup>Department of Environmental Medical Biology, Institute of Tropical Medicine and  
10   Arthropods of Medical Importance Resource Bank, Yonsei University College of  
11   Medicine, Seoul 03722, Korea

12   <sup>2</sup>Convergence Research Center for Insect Vectors, College of Life Science and  
13   Bioengineering, Incheon National University, Incheon 22012, Korea

14   <sup>3</sup>Department of Laboratory Medicine and Research Institute of Bacterial Resistance,  
15   Yonsei University College of Medicine, Seoul 03722, Korea

16  
17   **\*Corresponding author: Tai-Soon Yong**

18   Department of Environmental Medical Biology, Institute of Tropical Medicine and  
19   Arthropods of Medical Importance Resource Bank, Yonsei University College of  
20   Medicine, Seoul 03722, Korea

21   Telephone: +82-2-2228-1841

22   Fax: +82-2-363-8676

23   E-mail: [tsyong212@gmail.com](mailto:tsyong212@gmail.com)

24

26 **ABSTRACT**

27 **Purpose:** Allergens present in the feces or frass of cockroaches can cause allergic  
28 sensitization in humans. The use of fecal and frass extracts for immunotherapy has been  
29 previously investigated but has not yet been fully standardized. Here, we treated  
30 cockroaches with ampicillin to produce extracts with reduced amounts of total bacteria.

31 **Methods:** We performed targeted high-throughput sequencing of 16S rDNA to compare  
32 the microbiomes of ampicillin-treated and untreated (control) cockroaches. RNA-seq was  
33 performed to identify differentially expressed genes (DEGs) in ampicillin-treated  
34 cockroaches.

35 **Results:** Analysis of the microbiome revealed that alpha diversity was lower in the  
36 ampicillin-treated group than in the control group. Beta diversity analysis indicated that  
37 ampicillin treatment altered bacterial composition in the microbiome of cockroaches.  
38 Quantitative polymerase chain reaction revealed that almost all bacteria were removed  
39 from ampicillin-treated cockroaches. RNA-seq analysis revealed 1,236 DEGs in  
40 ampicillin-treated cockroaches (compared to untreated cockroaches). Unlike bacterial  
41 composition, the DEGs varied between the two groups. Among major allergens, the  
42 expression of *Bla g 2* decreased significantly in ampicillin-treated cockroaches  
43 (compared to untreated group).

44 **Conclusions:** In this study, the reduced level of allergens observed in cockroaches may  
45 be related to lower amounts of total bacteria caused by treatment with antibiotics. It is  
46 possible to make a protein extract with few bacteria for use in immunotherapy.

47

48 **Key words:** cockroaches, antibiotics, microbiome, allergens

49

## 50 INTRODUCTION

51           Cockroaches have existed for some 300-350 million years, with more than 4,000  
52 species described globally. They spread pathogenic bacteria through their feces or frass  
53 while traveling between locations, such as homes, shops, and hospitals [1]. Their  
54 omnivorous nature enables them to survive under a wide variety of conditions. The  
55 German cockroach, *Blattella germanica*, and its microbiome have been extensively  
56 investigated [2–4, 6]. Different gut microbiomes of *B. germanica* were identified at  
57 various locations inside and outside laboratory settings, likely due to differences in the  
58 diets available at these locations [2]. A laboratory-based study investigating the effect of  
59 diet on *B. germanica* confirmed that their microbiome changed dynamically according to  
60 food intake [3].

61           Several studies have reported that antibiotics directly affect the bacterial  
62 composition in the cockroach microbiota. Rosas *et al.* showed that rifampicin altered the  
63 *B. germanica* microbiota and that the second generation of insects following antibiotic  
64 treatment underwent microbiota recovery through fecal intake. Antibiotic-treated  
65 cockroaches showed changes in bacterial diversity and composition, including the  
66 removal of the endosymbiont *Blattabacterium* [4]. Another study reported difficulties in  
67 cockroach reproduction and growth following antibiotic treatment [5]. In *Riptortus*  
68 *pedestris*, the absence of an endosymbiont led to a decrease in hexamerin and  
69 vitellogenin, which affected egg production and insect development [6].

70           Cockroaches can spread pathogenic bacteria present in their gut or body to  
71 places with high human traffic, such as restaurants or hospitals [7], and the allergens in  
72 their feces or frass can cause allergen sensitization in humans [8]. Production of the  
73 major cockroach allergen Bla g 1 in female cockroaches is related to their reproductive  
74 cycle and is also affected by their food intake [9]. Bla g 1 can bind various lipids,  
75 suggesting that it has a digestive function related to the nonspecific transport of lipid  
76 molecules [10]. Similar to Bla g 1, Bla g 2 is present at high concentrations in the

77 digestive organs of cockroaches (esophagus, gut, and proventriculus), suggesting that  
78 Bla g 2 functions as a digestive enzyme [11]. Bla g 2 is regarded the most important *B.*  
79 *germanica* allergen, with the rate of sensitization being the highest among common  
80 cockroach allergens at 54–71% generally [12].

81 Because the potency of the cockroach protein extract was different for each  
82 cohort depending on the allergen content of the extract—as recently demonstrated in  
83 several studies on allergen immunotherapy [13, 14]—it is important to select a suitable  
84 protein extract for each patient [13].

85 Despite these variables, no studies have been conducted to determine the effect  
86 of bacteria in the cockroach before extracting the protein for immunotherapy. In the  
87 present study, we aimed to obtain a protein extract of *B. germanica* with reduced levels  
88 of bacteria using ampicillin, a broad-spectrum antibiotic.

89

## 90 MATERIALS AND METHODS

### 91 *Rearing conditions*

92           Cockroaches (*B. germanica*) were reared for several generations under the  
93 same laboratory conditions to minimize the potential influence of environmental factors  
94 and diet on their performance. All cockroaches were reared in plastic boxes (27 cm × 34  
95 cm × 19 cm) and incubated at 25°C and 50% relative humidity. *B. germanica* were fed  
96 sterilized fish food and provided with sterilized untreated or ampicillin-containing  
97 (autoclaved before the addition of 0.025% ampicillin) tap water *ad libitum*. The  
98 concentration of ampicillin was set based on data from a preliminary study, which  
99 showed that concentration did not significantly affect the survival of *B. germanica* (data  
100 not shown).

101

### 102 *Experimental design*

103           Newly hatched cockroaches (G1) were divided into two groups. Group A was  
104 offered ampicillin-treated water, while group C (control) was offered untreated water.  
105 Twenty-one days after becoming adults, ampicillin-treated (A) and untreated (C) female  
106 cockroaches were sampled for further analyses. *B. germanica* were sacrificed with CO<sub>2</sub>  
107 then surface-sterilized using alcohol and flash-frozen in liquid nitrogen. They were then  
108 individually crushed using a mortar and pestle and stored at -80 °C until further analysis.

109

### 110 *DNA extraction*

111           Cockroaches (n = 5 from each group) were frozen in liquid nitrogen and  
112 individually crushed using a mortar and pestle. Total DNA was extracted using the  
113 NucleoSpin DNA Insect Kit (Macherey-Nagel, Düren, Germany) according to the  
114 manufacturer's instructions. The DNA extracted from each sample was eluted in 20 µL  
115 of elution buffer. Procedures were all conducted at a clean bench, under a sterilized hood,

116 and in a DNA-free room. DNA concentrations were quantified using an ND-1000  
117 Nanodrop system (Thermo-Fisher Scientific, Waltham, MA,  
118 USA).

119

### 120 *Next-generation sequencing*

121 The 16S rDNA V3–V4 region was amplified through polymerase chain reaction  
122 (PCR) using forward and reverse primers (Table. 1) [15, 16], in an Illumina MiSeq V3  
123 cartridge (San Diego, CA, USA) with a 600-cycle format. A limited-cycle amplification  
124 step was performed to add multiplexing indices and Illumina sequencing adapters to the  
125 samples. The libraries were normalized, pooled, and sequenced on the Illumina MiSeq  
126 V3 cartridge platform according to the manufacturer's instructions.

| Primer Name      | Primer Sequence (5' → 3')                                   |
|------------------|-------------------------------------------------------------|
| 16S rDNA V3–V4_F | TCGTCGGCAGCGTCAGATGTGTATAAGAGACAGCCTAC<br>GGGNGGCWGCAG      |
| 16S rDNA V3–V4_R | GTCTCGTGGGCTCGGAGATGTGTATAAGAGACAGGACT<br>ACHVGGGTATCTAATCC |
| ActinF           | CACATACAACCTCCATTATGAAGTGCGA                                |
| ActinR           | TGTCGGCAATTCCGGTACATG                                       |
| BACT1369         | CGGTGAATACGTTTCYCGG                                         |
| PROK1492R        | GGWTACCTTGTTACGACTT                                         |
| Blag1F           | CTATATGACGCCATCCGTTCTC                                      |
| Blag1R           | CACATCAACTCCCTTGTCCTT                                       |
| Blag2F           | TGATGGGAATGTACAGGTGAA A                                     |

|        |                        |
|--------|------------------------|
| Blag2R | TGTTGAGATGTCGTGAGGTTAG |
| Blag5F | GATTGATGGGAAGCAAACACAC |
| Blag5R | CGATCTCCAAGTTCTCCAATC  |

127 **Table. 1.** Primers used in this study

128

129

130 *Bioinformatics and statistical analyses*

131 Bioinformatics analyses were performed according to the methods described in  
132 our previous study [16]. Taxonomic assignment was performed using the EzBioCloud  
133 database (<https://www.ezbiocloud.net/>) [15] and BLAST (v. 2.2.22), and pairwise  
134 alignments were generated to measure sequence similarity [16, 17]. All analyses were  
135 performed using BIOiPLUG, a commercially available ChunLab bioinformatics cloud  
136 platform for microbiome research (<https://www.bioiplug.com/>) [16]. The reads were  
137 normalized to 11,000 to perform the analyses. Phylogenetic analysis was performed,  
138 and Shannon indexes, unweighted pair group method with arithmetic mean (UPGMA)  
139 clustering, principal coordinates analysis (PCoA), permutational multivariate analysis of  
140 variance, linear discriminant analysis (LDA), and linear discriminant analysis effect size  
141 (LEfSe) were determined according to our previous study [16].

142

143 *Protein extraction*

144 Total protein was extracted by first adding 2 mL of PBS to each sample. The  
145 samples were then sonicated (QSonica Q500, Fullerton, CA, USA) and centrifuged at  
146 10,000 ×g for 30 min at 4°C. The resulting supernatants were filtered using a 0.22-µm  
147 membrane filter (Millex®, Tullagreen, Carrigtwohill, Co. Cork, Ireland).

148

149 *Enzyme-linked immunosorbent assay (ELISA)*

150 The Bla g 1, Bla g 2, and Bla g 5 allergens of *B. germanica* were quantified using  
151 corresponding ELISA kits (Indoor Biotechnologies, Charlottesville, VA, USA).

152

### 153 *RNA extraction and cDNA synthesis*

154 Total RNA was extracted by adding 1 mL of TRIZOL Reagent (GeneAll, Seoul,  
155 Korea) to each sample. The RNA extracted from each sample was eluted in 20 µL of the  
156 elution buffer. A master mix comprised 5× cDNA synthesis mix and 20× RTase was  
157 added to mRNA samples in PCR tubes for cDNA synthesis.

158

### 159 *Quantitative real-time PCR (qPCR)*

160 Quantitative real-time PCR (qPCR) was performed to quantify *Bla g 1*, *Bla g 2*,  
161 *Bla g 5*, and bacterial 16S rRNA in whole cockroaches. Actin 5C (accession number  
162 AJ861721.1) was used as the internal control, and primers specific to this gene were  
163 designed for this experiment: ActinF and ActinR (Table. 1) [4]. All bacterial 16S rRNA  
164 were amplified using the forward primer BACT1369 and the reverse primer PROK1492R  
165 (Table. 1) from XenoTech with AMPIGENE qPCR Mixes (ENZO, USA) [19]. *Bla g 1*  
166 (accession number EF202179.1), *Bla g 2* (accession number EF203068.1), and *Bla g 5*  
167 (accession number EF202178.1) gene expression was used as a measurement of major  
168 allergen content. We designed the following primers for this experiment: Blag1F and  
169 Blag1R, Blag2F and Blag2R, and Blag5F and Blag5R (Table. 1). qPCR analyses were  
170 performed using the 2× SensiFAST™ SYBR® Hi-ROX kit (Bioline Meridian Bioscience,  
171 Humber Rd, London) with SYBR Green as the fluorescent reporter, H<sub>2</sub>O, corresponding  
172 primers, and either genomic or complementary DNA. At the end of each reaction, a  
173 melting curve was generated to check the specificity of amplification and to confirm the  
174 absence of primer dimers. All reactions, including negative controls (containing water  
175 instead of DNA), were run in duplicate in 96-well plates.

176



177 *RNA-seq analysis*

178 We used total RNA and the TruSeq Stranded mRNA LT Sample Prep Kit (San  
179 Diego, California, USA) to construct cDNA libraries. The protocol consisted of polyA-  
180 selected RNA extraction, RNA fragmentation, random hexamer primed reverse  
181 transcription, and 100 nt paired-end sequencing by Illumina NovaSeq 6000 (San Diego,  
182 California, USA). The libraries were quantified using qPCR according to the qPCR  
183 Quantification Protocol Guide and qualified using an Agilent Technologies 2100  
184 Bioanalyzer.

185 Raw reads from the sequencer were preprocessed to remove low-quality and  
186 adapter sequences. The processed reads were aligned to the *B. germanica* genome  
187 using HISAT v2.1.0 [20]. HISAT utilizes two types of indexes for alignment (a global,  
188 whole-genome index, and tens of thousands of small local indexes). These index types  
189 are constructed using the same Burrows–Wheeler transform, and graph Ferragina  
190 Mangini index as Bowtie2. HISAT generates spliced alignments several times faster than  
191 the Burrows–Wheeler Aligner (BWA) and Bowtie because of how efficiently it utilizes  
192 these data structures and algorithms. The reference genome sequence of *B. germanica*  
193 and annotation data were downloaded from NCBI. Known transcripts were assembled  
194 using StringTie v1.3.4d [21, 22], and the results were used to calculate the expression  
195 abundance of transcripts and genes as read count or FPKM (fragments per kilobase of  
196 exon per million fragments mapped) value per sample. Expression profiles were used to  
197 further analyze differentially expressed genes (DEGs). DEGs or transcripts from groups  
198 with different conditions can be filtered through statistical hypothesis testing.

199

200 *Statistical analysis of gene expression*

201 The relative abundances of gene expression were measured in the read count  
202 using StringTie. We performed statistical analyses to detect DEGs using the estimates  
203 of abundance for each gene in individual samples. Genes with more than one “zero” read

204 count value were excluded. Filtered data were log<sub>2</sub>-transformed and subjected to  
205 trimmed mean of M-values (TMM) normalization. The statistical significance of the fold  
206 change in expression (i.e., differential expression data) was determined using the exact  
207 test from edgeR [23], wherein the null hypothesis was that no difference exists among  
208 groups. The false discovery rate (FDR) was controlled by adjusting the p-value using the  
209 Benjamini-Hochberg algorithm. For DEGs, hierarchical clustering analysis was  
210 performed using complete linkage and Euclidean distance as a measure of similarity.  
211 Gene-enrichment and KEGG pathway analyses for DEGs were also performed based  
212 on the Gene Ontology (<http://geneontology.org/>) and KEGG pathway  
213 (<https://www.genome.jp/kegg/>) databases, respectively. We used the multidimensional  
214 scaling (MDS) method to visualize the similarities among samples and applied the  
215 Euclidean distance as a measure of dissimilarity. Hierarchical clustering analysis was  
216 also performed using complete linkage and Euclidean distance as a measure of similarity  
217 to display the expression patterns of differentially expressed transcripts that satisfied a  
218  $|\text{fold change}| \geq 2$  and a raw P-value  $< 0.05$ .

219

220

221 **RESULTS**

222 First-generation cockroaches reached the adult stage and were kept for an  
223 additional 21 days before being sacrificed for further analysis (Fig. 1). qPCR analysis  
224 showed that the number of total bacteria in the cockroaches was 2,000 times higher in  
225 the control group than that in the ampicillin-treated group (Fig. 2).

226

227 **Fig. 1.** Experimental design depicting ampicillin treatment of *B. germanica*. The  
228 cockroaches were divided into two groups (A and C) and individuals were either treated  
229 with ampicillin (A) or left untreated as control specimens (C). Ampicillin was administered  
230 to cockroaches from the G1 (i.e., offspring from G0) generation, 21 days after they had  
231 reached the adult stage. Whole bodies were then collected and analyzed.

232

233 **Fig. 2.** Relative quantification of the total bacterial population in the ampicillin-treated (A)  
234 and untreated (C) cockroach groups.

235

236 Comparison of the microbial composition data showed, in the control group, the  
237 endosymbiont *Blattabacterium* CP001487\_s was the most abundant (27.43%), followed  
238 by *Fusobacterium varium*. By contrast, *Desulfovibrio\_g2* was the most abundant  
239 (64.39%) in the ampicillin-treated group (Fig. 3A). LEfSe analysis of sampled  
240 cockroaches showed that, in the control group, *Blattabacterium* CP001487\_s showed  
241 the greatest difference in composition, followed by *F. varium*, *Rhodopila\_uc*, and  
242 *Dysgonomonas\_uc* (Fig. 3B). In the ampicillin-treated group, *Desulfovibrio\_g2* and  
243 Planctomycetes were the bacteria that showed the greatest differences in abundance  
244 (Fig. 3B). Analysis of alpha diversity revealed a significantly lower number of operational  
245 taxonomic units (OTUs) ( $P = 0.009$ ) in the ampicillin-treated group (Fig. 4A). Although  
246 not statistically significant, phylogenetic diversity tended to be low in the ampicillin-  
247 treated group ( $P = 0.076$ ) (Fig. 4B), indicating low overall abundance. A significant

248 difference was noted in the Shannon diversity index, reflecting richness and equity  
249 simultaneously ( $P = 0.009$ ) (Fig. 4C). Analysis of diversity using UPGMA clustering  
250 showed that the samples from the control and ampicillin-treated groups were clustered  
251 separately (Fig. 5A). Similarly, PCoA showed that both groups were clustered separately,  
252 with samples from the ampicillin-treated and control groups located on the left and right  
253 sides of the plot, respectively (Fig. 5B).

254

255 **Fig. 3.** Bacterial composition at the species level in the control and ampicillin-treated  
256 groups. (A) Microbiome composition of each group ( $n = 5$ ). (B) Linear discriminant  
257 analysis effect size (LEfSe) analysis of differentially abundant bacterial taxa among the  
258 two groups. Only taxa meeting a significant ( $>4$ ) LDA threshold are shown.

259

260 **Fig. 4.** Box plots showing alpha diversity in the control and ampicillin-treated groups. (A)  
261 The number of operational taxonomic units (OTUs). (B) Phylogenetic diversity  
262 (abundance). (C) Shannon diversity index (measuring richness and equity in the  
263 distribution of the species). \* indicates a  $P$ -value  $< 0.05$  from the Wilcoxon rank-sum test.

264

265 **Fig. 5.** Beta diversity in the control and ampicillin-treated groups. (A) UPGMA  
266 (unweighted pair group method with arithmetic mean) clustering. (B) Principal  
267 coordinates analysis (PCA) depicting differences in the taxonomic compositions of the  
268 bacterial communities among the two groups.

269

270 RNA-sequencing was performed to explore the effect of ampicillin on gene  
271 expression in cockroaches. UPGMA clustering results showed that the control group was  
272 grouped together, but that one ampicillin-treated sample was clustered separately (Fig.  
273 6A). Principal components analysis (PCA) confirmed that separation was achieved  
274 between the control and ampicillin-treated groups (Fig. 6B). Hierarchical clustering

275 analysis between the control and ampicillin-treated groups generated a heat map of  
276 1,236 DEGs for both groups (Fig. 6C). Gene Ontology (GO) functional classification  
277 analysis revealed that these 1,236 DEGs were divided among three main categories  
278 (biological process, cellular component, and molecular function), where differential  
279 expression more than doubled in 28, 16, and 13 items, respectively, between the control  
280 and ampicillin-treated groups (Fig. 7).

281

282 **Fig. 6.** Transcriptome analysis in ampicillin-treated and control cockroaches. (A) UPGMA  
283 (unweighted pair group method with arithmetic mean) clustering. (B) Principal  
284 components analysis (PCA) depicting the differences in the differentially expressed  
285 genes (DEGs) between the control and ampicillin-treated groups. (C) Heat map of  
286 transcriptional expression patterns of the two groups, displaying the expression profile  
287 of the top 1,236 DEGs for each sample in the RNA-seq dataset.

288

289 **Fig. 7.** Gene Ontology (GO) functional classification analysis of differentially expressed  
290 genes (DEGs) between the control and ampicillin-treated groups. Based on sequence  
291 homology, 1,236 DEGs were categorized into three main categories, biological process,  
292 cellular component, and molecular function, with 28, 16, and 13 functional groups,  
293 respectively.

294

295 RNA-sequencing showed that the expression of *Bla g 2* RNA more than doubled  
296 in the ampicillin-treated group (data not shown). Subsequently, RNA levels of the genes  
297 encoding the three major allergens *Bla g 1* (Fig. 8A), *Bla g 2* (Fig. 8B), and *Bla g 5* (Fig.  
298 8C) were measured using qPCR. Our findings confirmed that the expression levels of  
299 *Bla g 1* ( $P = 0.000594$ ) and *Bla g 2* ( $P < 0.00001$ ), but not *Bla g 5* ( $P = 0.05067$ ), were  
300 significantly decreased in the ampicillin-treated group compared to those in the control  
301 group. Additionally, we noted a larger decrease in the level of *Bla g 2* than that of *Bla g*

302 1 (Fig. 8).

303

304 **Fig. 8.** Quantitative PCR (qPCR) analysis showing gene expression levels in  
305 cockroaches. (A) *Bla g 1*, (B) *Bla g 2*, and (C) *Bla g 5*.

306

307 At the protein level, we measured the amounts of *Bla g 1* (Fig. 9A), *Bla g 2* (Fig.  
308 9B), and *Bla g 5* (Fig. 9C). The results were similar to those obtained from transcriptomic  
309 analyses. No significant difference was detected in *Bla g 5* ( $P = 0.296897$ ), whereas a  
310 significant decrease in the expression of *Bla g 1* ( $P = 0.000463$ ) and *Bla g 2* ( $P = 0.00001$ )  
311 was observed in the ampicillin-treated group compared to that in the control group.  
312 Here, *Bla g 2* sustained yet again a more notable decrease than *Bla g 1* (Fig. 9).

313

314 **Fig. 9.** Allergen levels in the extracts from the two cockroach groups. Concentrations of  
315 (A) *Bla g 1*, (B) *Bla g 2*, and (C) *Bla g 5* in the extracts were measured using enzyme-  
316 linked immunosorbent assays (ELISAs).

317

318

## 319 **DISCUSSION**

320 We treated cockroaches (*B. germanica*) with ampicillin to obtain a protein extract  
321 containing a minimal number of bacteria for immunotherapy. Analysis of *B. germanica*  
322 following treatment revealed several changes.

323 First, the total bacterial population was notably affected. Compared with the  
324 control group, total bacteria in cockroaches from the ampicillin-treated group  
325 disappeared almost completely, perhaps because ampicillin eliminated both gram-  
326 positive and gram-negative bacteria.

327 The microbiome study revealed marked differences at the species level. A  
328 'super-resistant' taxon was previously identified in *B. germanica* treated with rifampicin

329 instead of ampicillin [4]. The *Desulfovibrio* and *Plantomycetes* genera occurred in lower  
330 numbers in control cockroaches but comprised most of the microbiota of ampicillin-  
331 treated cockroaches. This finding is supported by the fact that all *Plantomycetes* are  
332 resistant to  $\beta$ -lactam antibiotics [24], including ampicillin, which belongs to the penicillin  
333 group of antibiotics. Similarly, *Desulfovibrio* and *Adiutrix* are resistant to ampicillin, which  
334 eliminated other bacterial species. Among the several bacterial species found in the  
335 control group, *Blattabacterium* is the most important. In a previous study, treatment with  
336 rifampicin failed to eliminate *Blattabacterium* from the first generation of cockroaches;  
337 however, with continued treatment, the bacteria were eliminated from second-generation  
338 specimens [4]. Our data showed that treatment with ampicillin immediately eliminated  
339 *Blattabacterium* from first-generation adults. *Blattabacterium* is an endosymbiont of *B.*  
340 *germanica*, in which it is involved in the synthesis of essential amino acids and various  
341 vitamins, as well as in nitrogen recycling [25]. A previous study showed that tetracycline  
342 removed the endosymbiont of *Riptortus pedestris*, and that the expression of genes  
343 encoding hexamerin and vitellogenin was reduced. Consequently, these findings  
344 confirmed the factors that affected egg production and development [6]. Here, we  
345 expected that the absence of an endosymbiont would lead to several changes.  
346 Essentially, the reported decrease in bacterial composition produced differences in alpha  
347 and beta diversity. Because ampicillin reduced the bacterial load, OTUs were  
348 significantly lower in the ampicillin-treated group than in the control group. Phylogenetic  
349 diversity (indicating abundance) was not significantly different, but tended to be lower in  
350 the ampicillin-treated group. The Shannon diversity index significantly decreased,  
351 reducing both richness and equity. We noted a decrease in both the species number and  
352 the ratio of bacteria in ampicillin-treated cockroaches (compared to the total bacteria  
353 found in control specimens). Analysis of beta diversity using UPGMA and PCoA showed  
354 a clear difference in clustering between the two groups.

355 RNA-seq was performed to identify changes in gene expression at the RNA level

356 caused by ampicillin. Results similar to those from microbiome clustering analysis were  
357 confirmed at the RNA level. Hierarchical clustering and heat map analysis showed that  
358 one of the ampicillin-treated samples was clustered separately, but that clustering  
359 occurred first among the control group. PCA confirmed that each group was well  
360 clustered. Most of the ampicillin-treated *B. germanica* showed decreased levels of DNA;  
361 however, gene levels were either substantially increased or decreased at the RNA level.  
362 DEGs were enriched in biological, metabolic, and cellular processes. Differential  
363 expression of various genes from the two groups was also noted in developmental  
364 process and growth, as well as in cellular component, with several differences noted  
365 between the cells and the organelles. A significant difference was observed in the  
366 molecular functions related to catalytic activity and binding. Therefore, at the RNA level,  
367 gene expression may increase compared to the control group, instead of decrease with  
368 antibiotic treatment, with differential expression occurring in various functions.

369 Allergen data were obtained at the transcriptomic and proteomic levels, following  
370 analyses to confirm changes in the allergens according to these changes. Similar  
371 patterns were observed at both levels. There was no significant difference in Bla g 5, but  
372 its abundance tended to be lower in the ampicillin-treated group than in the control group.  
373 By contrast, Bla g 1 and Bla g 2 showed a significant decrease in abundance in the  
374 ampicillin-treated group compared to the control group.

375 The exact mechanism of allergen production in German cockroaches is  
376 unknown. However, clear differences in Bla g 1 production were observed based on the  
377 insect's level of starvation or its stage in the gonadotropic cycle [9]. Therefore, we  
378 expected to observe changes caused by several factors in the present study as well.  
379 Bacteria were removed by ampicillin treatment and likely included species that promoted  
380 the growth of cockroaches, accounting for the difference in total bacteria. The inhibition  
381 of bacterial growth may have affected allergen production, with *Blattabacterium* being  
382 probably the most influential member of the cockroach microbiota. This endosymbiont is



383 responsible for the nitrogen cycle and the production of essential amino acids and  
384 vitamins in the German cockroach [25]. Moreover, in other insects, *Blattabacterium*  
385 reduces the expression of genes involved in reproduction and growth inhibition. Similar  
386 growth rates were observed in *R. pedestris* originally without the endosymbiont and in  
387 those treated with antibiotics to remove the bacterium [6]. German cockroaches may  
388 also experience changes in reproduction and growth due to the removal of  
389 *Blattabacterium*. RNA-seq highlighted numerous changes in gene expression. Therefore,  
390 we suggest that ampicillin may have influenced the production of allergens. Although  
391 antibiotics primarily affect bacteria, they may also indirectly affect allergens through their  
392 effects on bacteria.

393 A limitation of this experiment was that it was not possible to culture  
394 *Blattabacterium* alone. If *Blattabacterium* in German cockroaches could be specifically  
395 targeted, it would be possible to study only the effects of *Blattabacterium* while excluding  
396 those of other bacteria.

397 In the present study, protein extraction from ampicillin-treated *B. germanica* was  
398 optimized to obtain an extract containing a small amount of Bla g 2 compared to Bla g 1  
399 and Bla g 5, with very few bacteria. Ampicillin treatment reduced total numbers of  
400 bacteria associated with cockroaches. As a result, we suggest that reduced numbers of  
401 bacteria may have influenced the production of allergens. Future studies should  
402 investigate the effect of bacteria on patients undergoing immunotherapy using protein  
403 extracts obtained from the German cockroach. In addition, methods to prepare protein  
404 extracts with varying amounts of allergens should be optimized.

405

#### 406 **Acknowledgments:**

407 This study was supported by a National Research Foundation of Korea (NRF) Grant  
408 funded by the Korean Government (MEST; Numbers NRF-2019R1A2B5B01069843  
409 and NRF-2020R111A2074562).

410

411 **Disclosure:** The authors declare no conflicts of interest.

412

## References

1. Guzman J, Vilcinskas A. Bacteria associated with cockroaches: health risk or biotechnological opportunity? *Appl Microbiol Biotechnol* 2020;104:10369-87. <https://doi.org/10.1007/s00253-020-10973-6> PMID: 33128616
2. Kakumanu ML, Maritz JM, Carlton JM, Schal C. Overlapping Community Compositions of Gut and Fecal Microbiomes in Lab-Reared and Field-Collected German Cockroaches. *Appl Environ Microbiol* 2018;84:e01037-18. <https://doi.org/10.1128/AEM.01037-18> PMID: 29959246
3. Pérez-Cobas AE, Maiques E, Angelova A, Carrasco P, Moya A, Latorre A. Diet shapes the gut microbiota of the omnivorous cockroach *Blattella germanica*. *FEMS Microbiol Ecol* 2015;91:fiv022. <https://doi.org/10.1093/femsec/fiv022> PMID: 25764470
- 4 - Rosas T, García-Ferris C, Domínguez-Santos R, Llop P, Latorre A, Moya A. Rifampicin treatment of *Blattella germanica* evidences a fecal transmission route of their gut microbiota. *FEMS Microbiol Ecol* 2018;94:fiy002. <https://doi.org/10.1093/femsec/fiy002> PMID: 29325007
- 5- Pietri JE, Tiffany C, Liang D. Disruption of the microbiota affects physiological and evolutionary aspects of insecticide resistance in the German cockroach, an important urban pest. *PLoS One* 2018;13:e0207985. <https://doi.org/10.1371/journal.pone.0207985> PMID: 30540788
- 6- Lee JB, Park KE, Lee SA, Jang SH, Eo HJ, Jang HA et al. Gut symbiotic bacteria stimulate insect growth and egg production by modulating hexamerin and vitellogenin gene expression. *Dev Comp Immunol* 2017;69:12-22. <https://doi.org/10.1016/j.dci.2016.11.019> PMID: 27932027
7. Guzman J, Vilcinskas A. Bacteria associated with cockroaches: health risk or biotechnological opportunity? *Appl Microbiol Biotechnol* 2020;104:10369-87. <https://doi.org/10.1007/s00253-020-10973-6> PMID: 33128616
8. Do DC, Zhao Y, Gao P. Cockroach Allergen Exposure and Risk of Asthma. *Allergy* 2016;71:436-74. <https://doi.org/10.1111/all.12827> PMID: 26706467

9. Gore JC, Schal C. Expression, production and excretion of Bla g 1, a major human allergen, in relation to food intake in the German cockroach, *Blattella germanica*. *Med Vet Entomol* 2005;19:127-34. <https://doi.org/10.1111/j.0269-283X.2005.00550.x> PMID: 15958021
10. Mueller GA, Pedersen LC, Lih FB, Glesner J, Moon AF, Chapman MD et al. The novel structure of the cockroach allergen Bla g 1 has implications for allergenicity and exposure assessment. *J Allergy Clin Immunol* 2013;132:1420-6. <https://doi.org/10.1016/j.jaci.2013.06.014> PMID: 23915714
11. Arruda LK, Vailes LD, Mann BJ, Shannon J, Fox JW, Vedvick TS et al. Molecular Cloning of a Major Cockroach (*Blattella germanica*) Allergen, Bla g 2. Sequence homology to the aspartic proteases. *J Biol Chem* 1995;270:19563-8. <https://doi.org/10.1074/jbc.270.33.19563> PMID: 7642642
12. Sohn MH, Kim KE. The Cockroach and Allergic Diseases. *Allergy Asthma Immunol Res* 2012;4:264-9. <https://doi.org/10.4168/aaair.2012.4.5.264> PMID: 22950031
13. Birrueta G, Frazier A, Pomés A, Glesner J, Filep S, Schal C et al. Variability in German Cockroach Extract Composition Greatly Impacts T Cell Potency in Cockroach-Allergic Donors. *Front Immunol* 2019;10:313. <https://doi.org/10.3389/fimmu.2019.00313> PMID: 30891032
14. Glesner J, Filep S, Vailes LD, Wünschmann S, Chapman MD, Birrueta G et al. Allergen content in German cockroach extracts and sensitization profiles to a new expanded set of cockroach allergens determine in vitro extract potency for IgE reactivity. *J Allergy Clin Immunol* 2019;143:1474-81. <https://doi.org/10.1016/j.jaci.2018.07.036> PMID: 30170124
15. Claudia SLV, Sota O, Koichi H. Composition of the Cockroach Gut Microbiome in the Presence of Parasitic Nematodes. *Microbes Environ* 2016;31:314-20. <https://doi.org/10.1264/jsme2.ME16088> PMID: 27524304

16. Lee S, Kim JY, Yi MH, Lee IY, Fyumagwa R, Yong TS. Comparative microbiomes of ticks collected from a black rhino and its surrounding environment. *Int J Parasitol Parasites Wildl* 2019;28:243-6. <https://doi.org/10.1016/j.ijppaw.2019.05.008> PMID: 31198683
17. Myers EW, Miller W. Optimal alignments in linear space. *Comput Appl Biosci* 1988;4:11-7. <https://doi.org/10.1093/bioinformatics/4.1.11> PMID: 3382986
18. Altschul SF, Gish W, Miller W, Myers EW, Lipman DJ. Basic local alignment search tool. *J Mol Biol* 1990;11:403-10. [https://doi.org/10.1016/S0022-2836\(05\)80360-2](https://doi.org/10.1016/S0022-2836(05)80360-2) PMID: 2231712
19. Lee J, Kim JY, Yi MH, Hwang Y, Lee IY, Nam SH et al. Comparative microbiome analysis of *Dermatophagoides farinae*, *Dermatophagoides pteronyssinus*, and *Tyrophagus putrescentiae*. *J Allergy Clin Immunol* 2019;143:1620-3. <https://doi.org/10.1016/j.jaci.2018.10.062> PMID: 30528614
20. Kim D, Langmead B, Salzberg SL. HISAT: a fast spliced aligner with low memory requirements. *Nat Methods* 2015;12:357-60. <https://doi.org/10.1038/nmeth.3317> PMID: 25751142
21. Pertea M, Pertea GM, Antonescu CM, Chang TC, Mendell JT, Salzberg SL. StringTie enables improved reconstruction of a transcriptome from RNA-seq reads. *Nat Biotechnol* 2015;33:290-5. <https://doi.org/10.1038/nbt.3122> PMID: 25690850
22. Pertea M, Kim D, Pertea GM, Leek JT, Salzberg SL. Transcript-level expression analysis of RNA-seq experiments with HISAT, StringTie and Ballgown. *Nat Protoc* 2016;11:1650-67. <https://doi.org/10.1038/nprot.2016.095> PMID: 27560171
23. Robinson MD, McCarthy DJ, Smyth GK. edgeR: a Bioconductor package for differential expression analysis of digital gene expression data. *Bioinformatics* 2010;26:139-40. <https://doi.org/10.1093/bioinformatics/btp616> PMID: 19910308
24. Cayrou C, Raoult D, Drancourt M. Broad-spectrum antibiotic resistance of Planctomycetes organisms determined by Etest. *J Antimicrob Chemother* 2010;65:2119-22. <https://doi.org/10.1093/jac/dkq290> PMID: 20699245

25. Sabree ZL, Kambhampati S, Moran NA. Nitrogen recycling and nutritional provisioning by Blattabacterium, the cockroach endosymbiont. Proc Natl Acad Sci U S A 2009;106:19521-6. <https://doi.org/10.1073/pnas.0907504106> PMID: 19880743



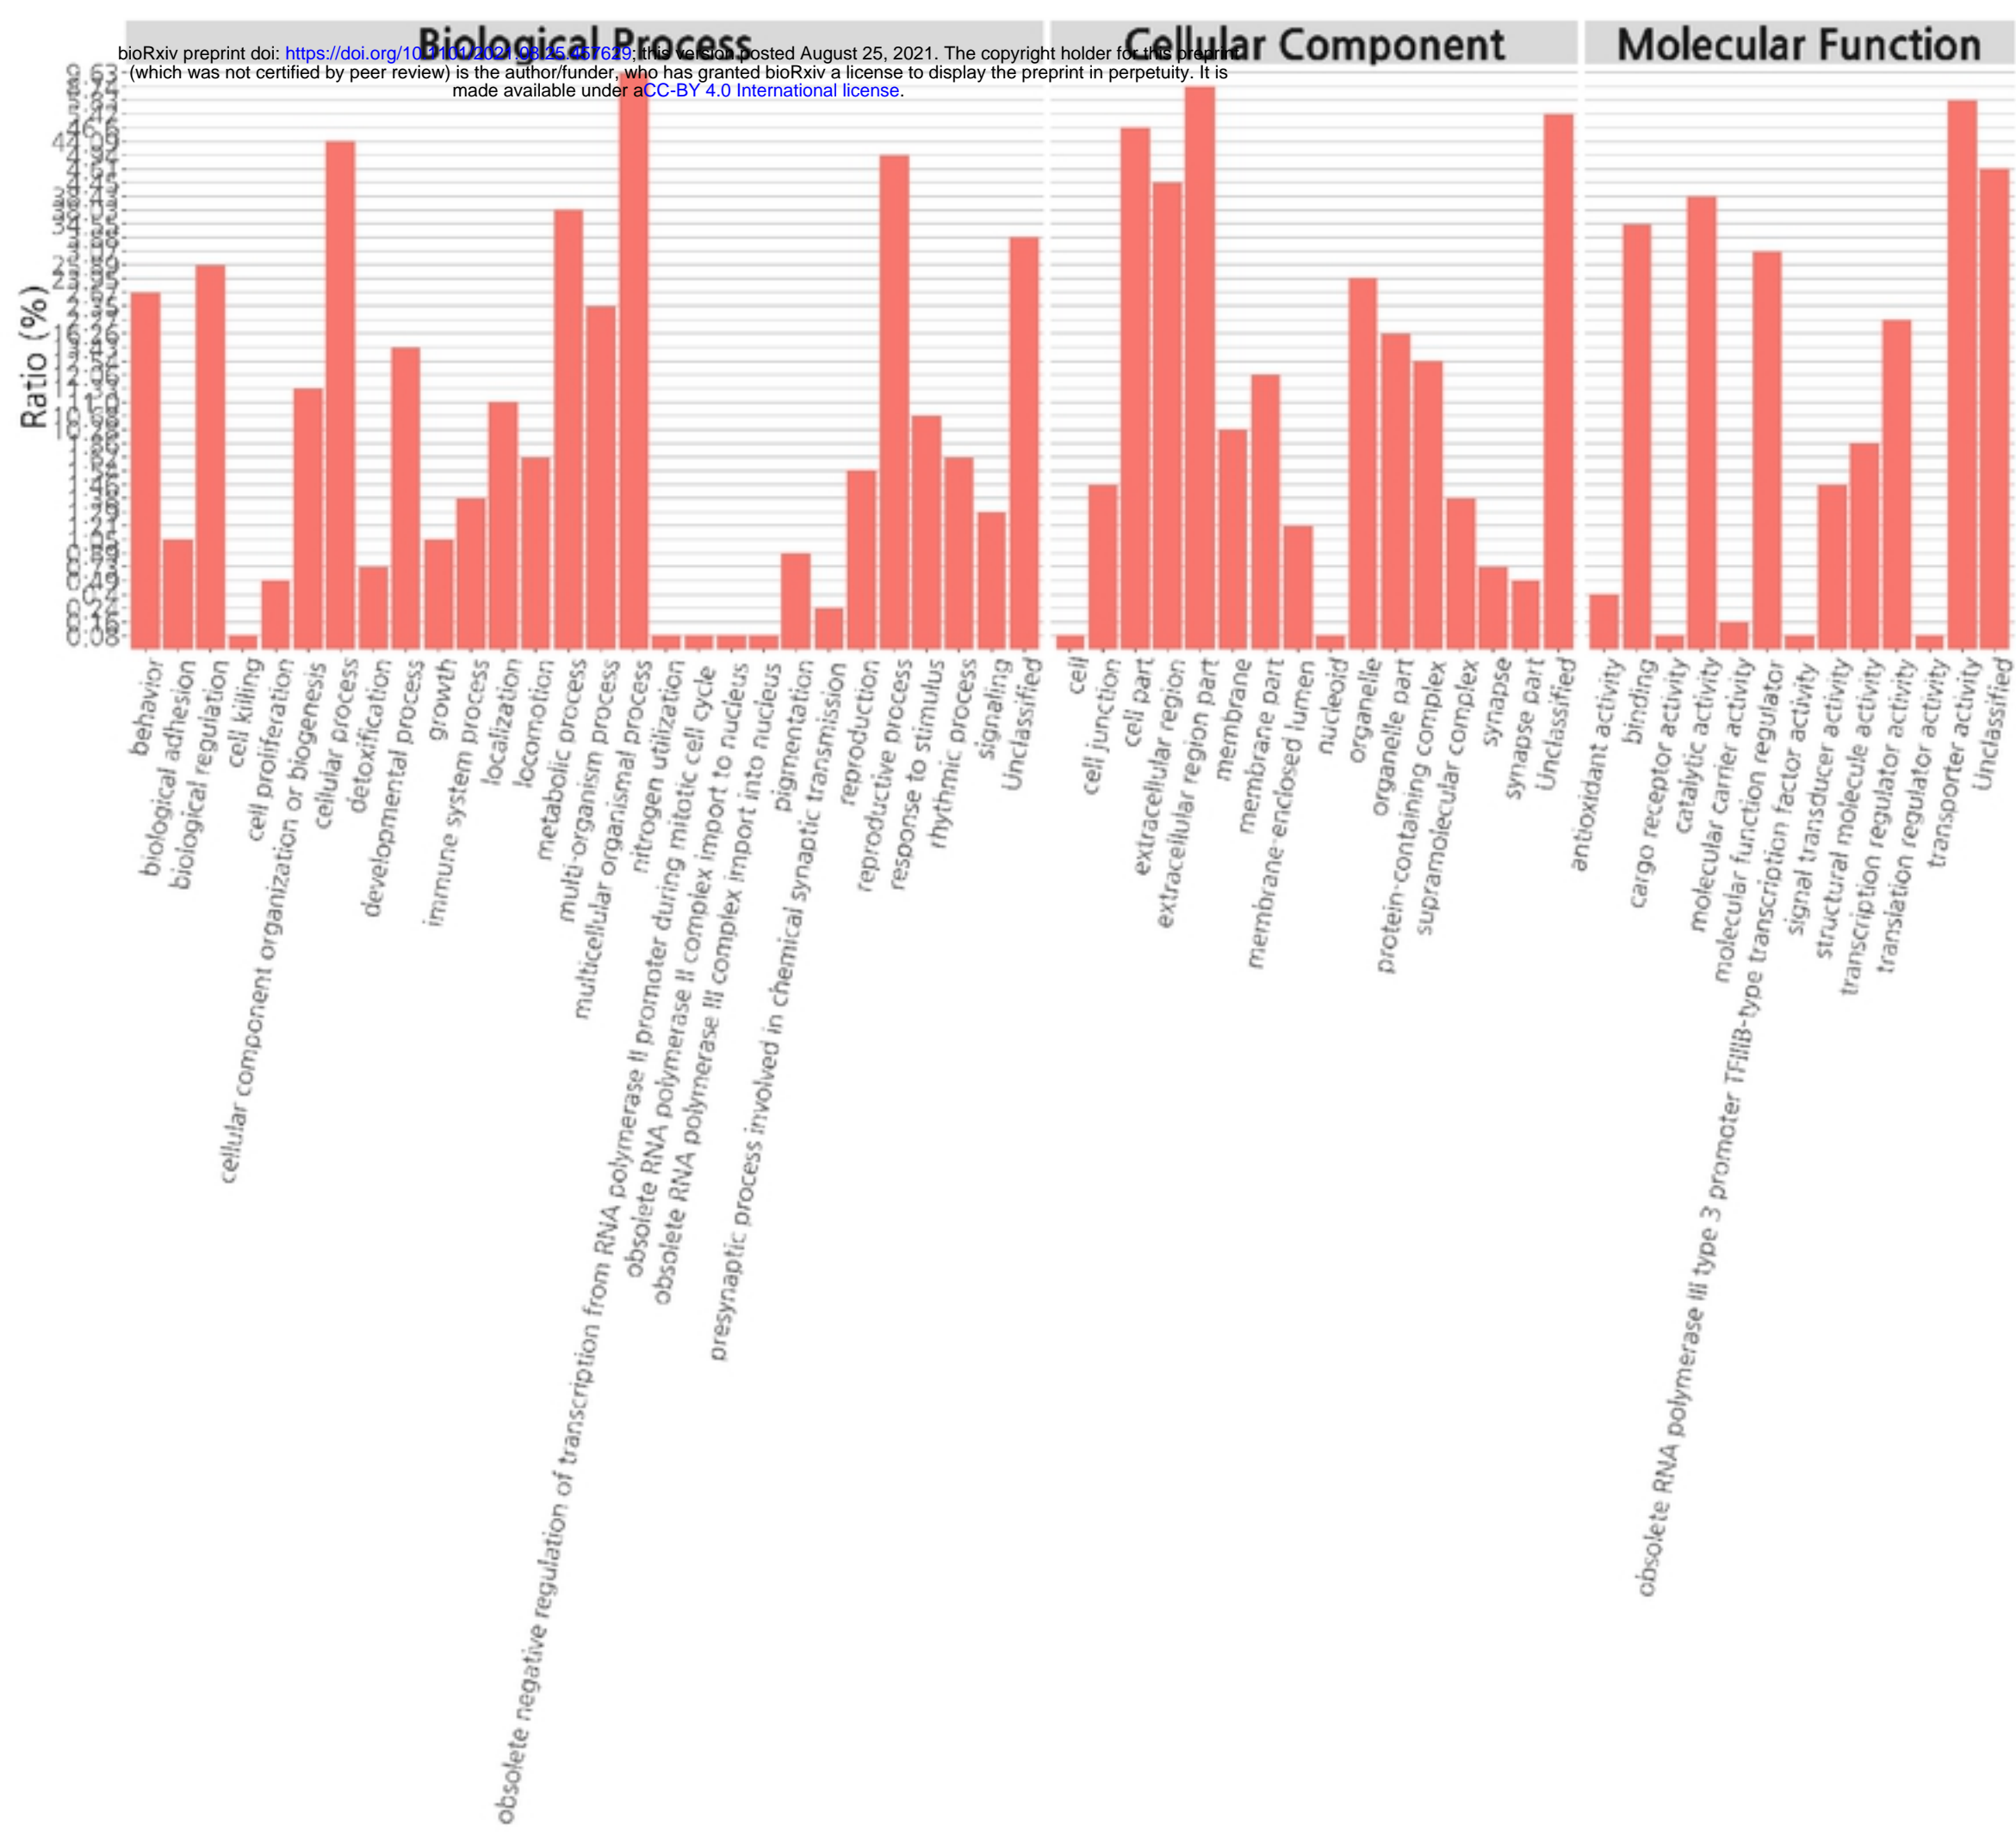

Figure



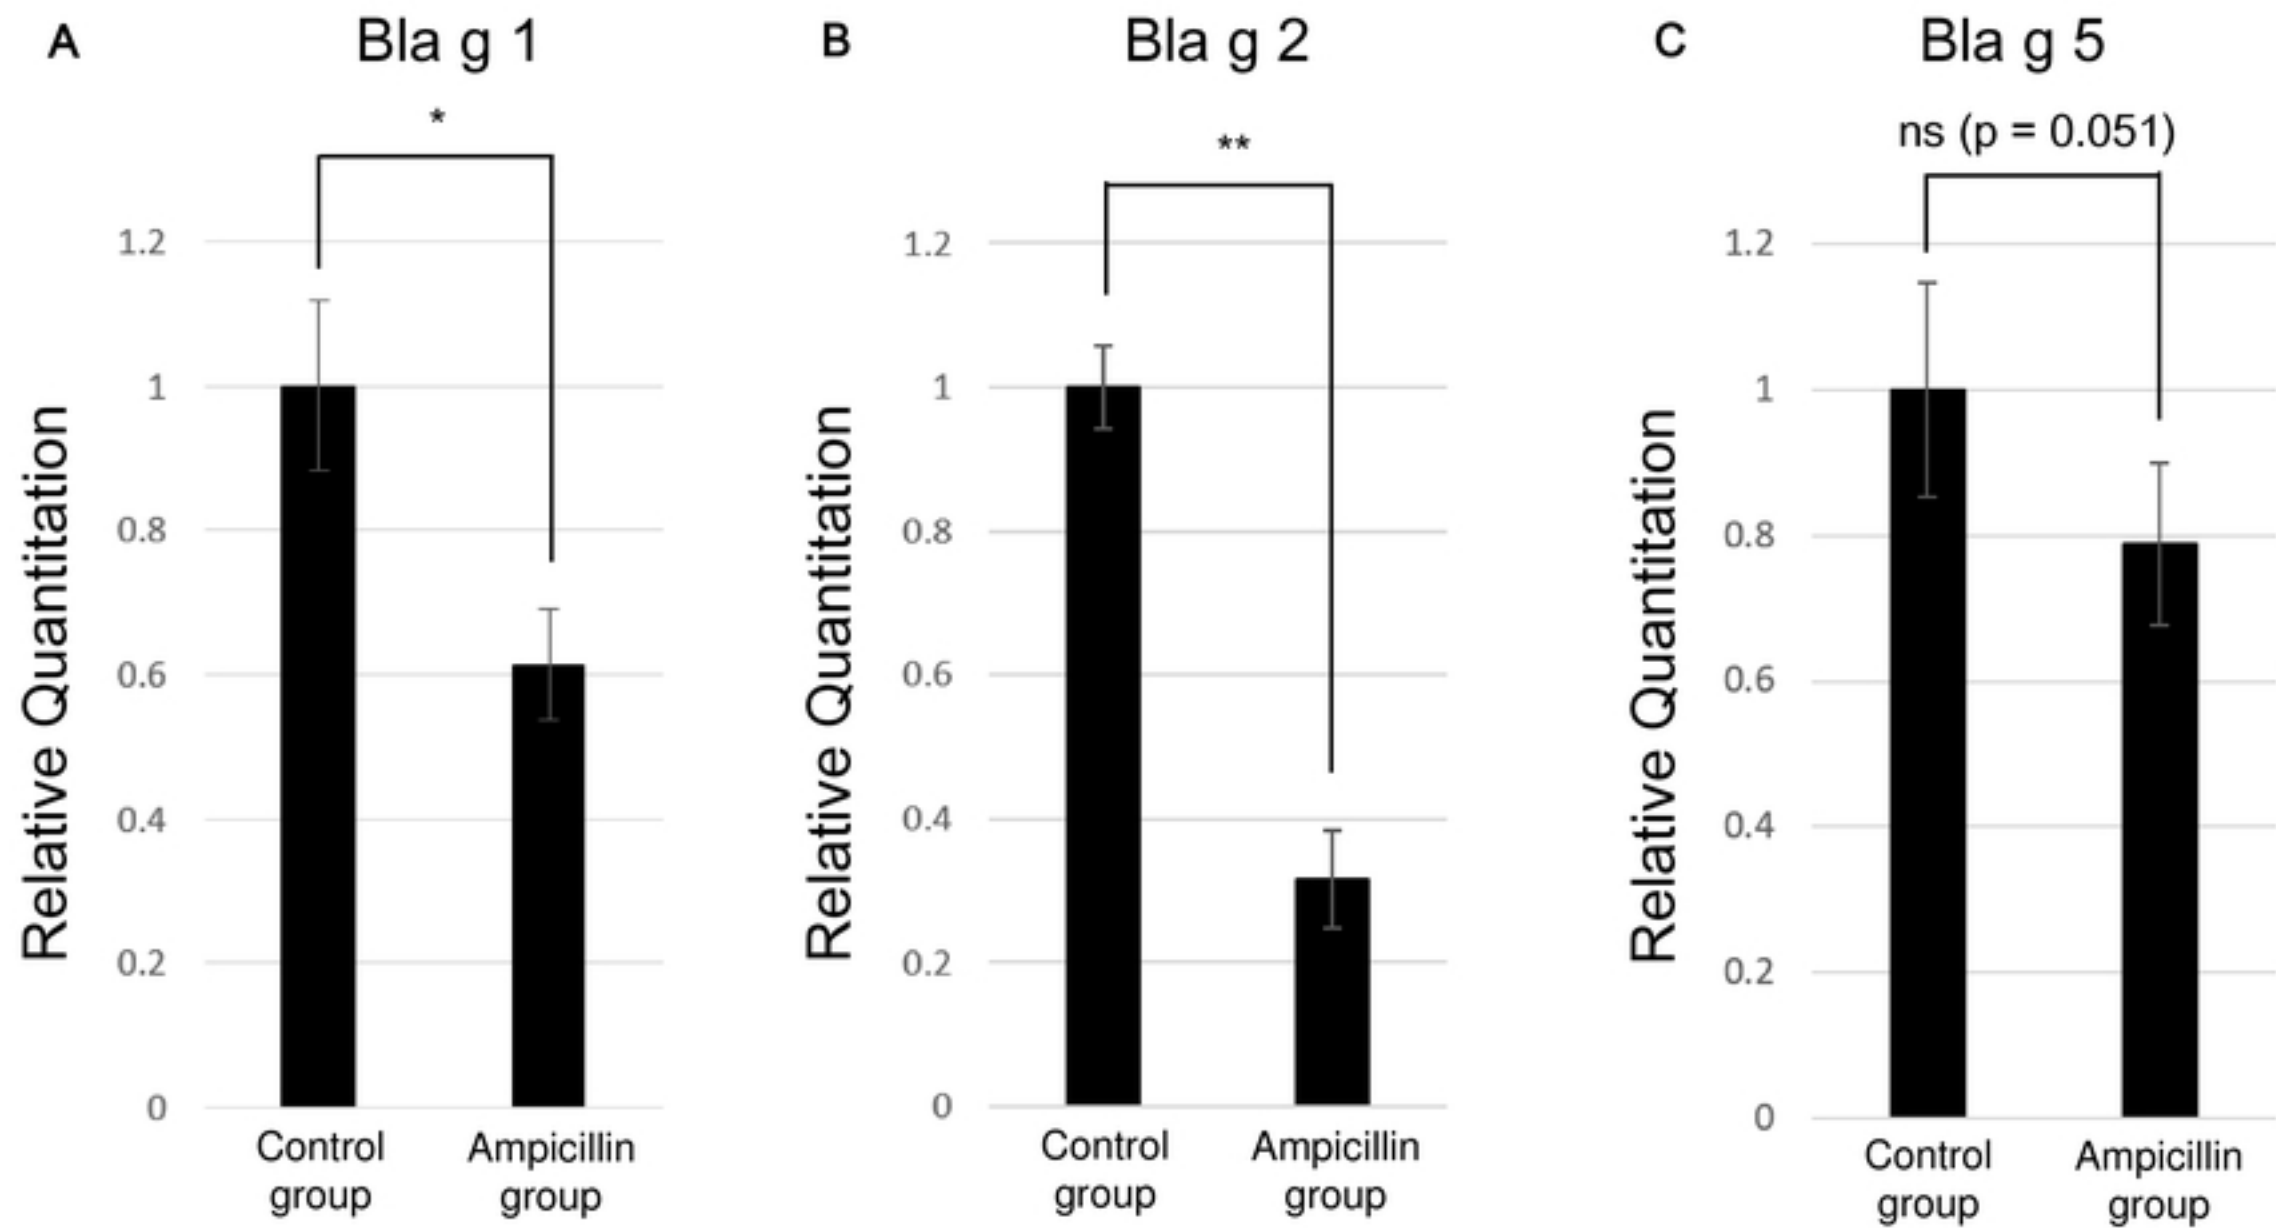

Figure

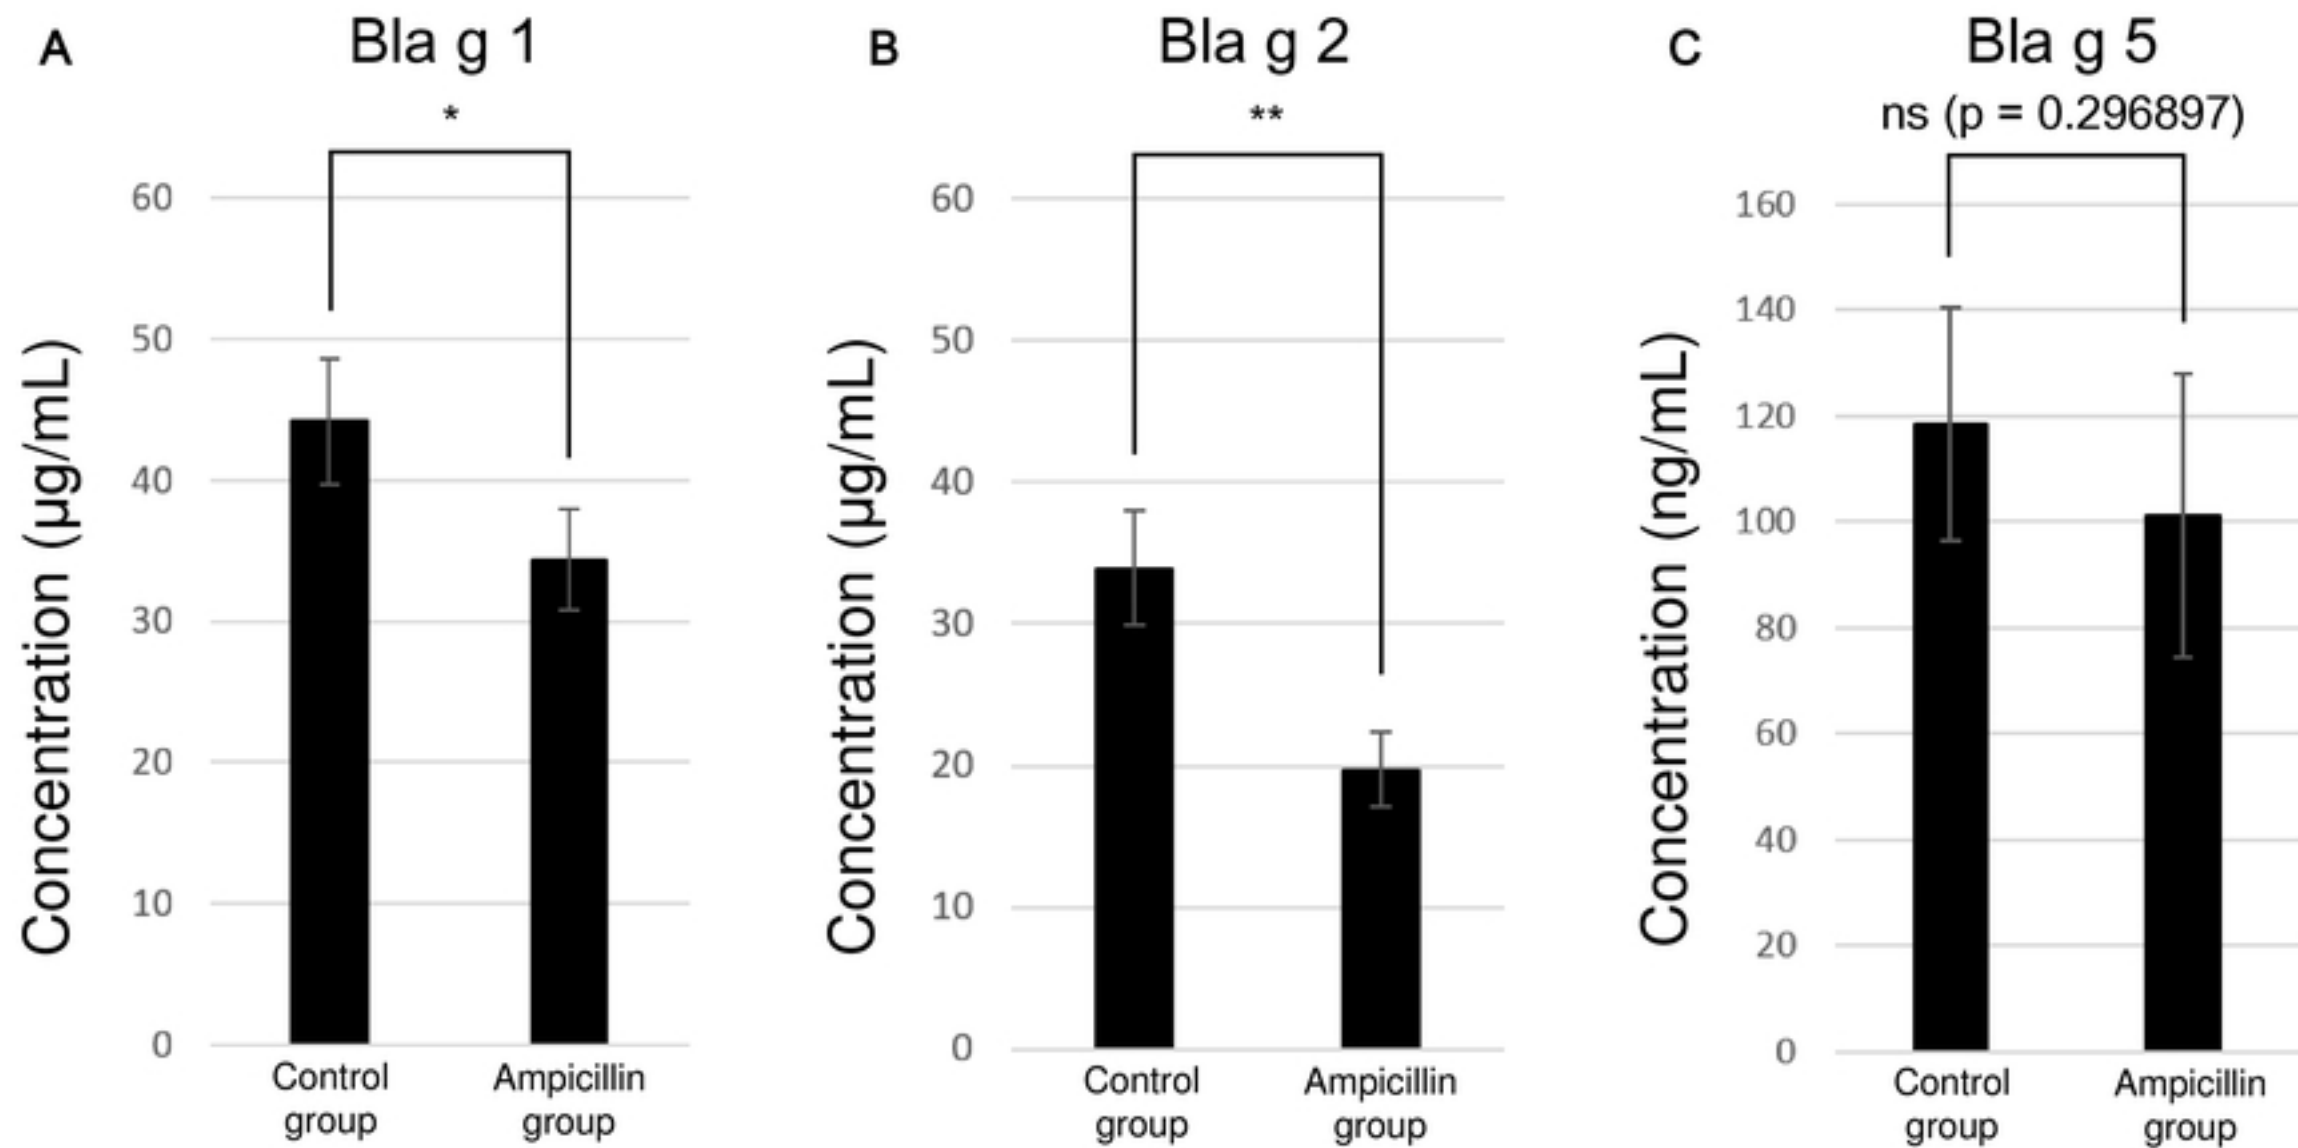

Figure

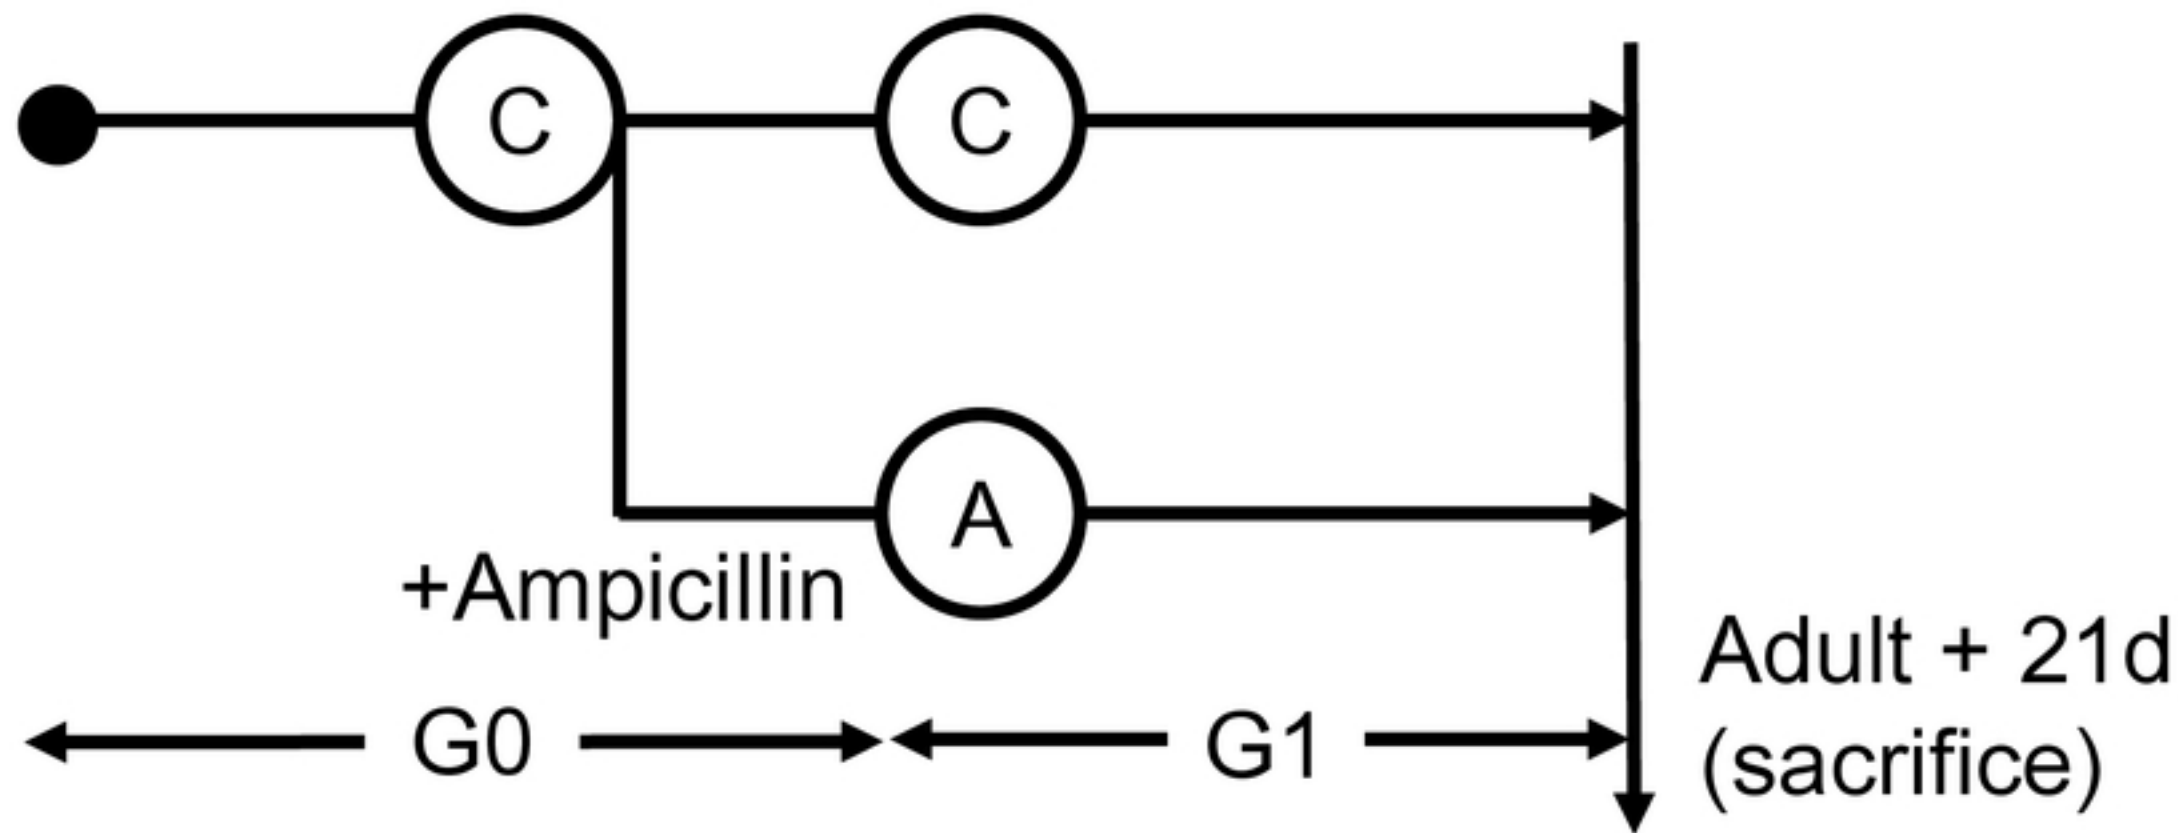

Figure

# Total bacteria

Relative Quantitation

\*\*

2500

2000

1500

1000

500

0

Control group

Ampicillin group

bioRxiv preprint doi: <https://doi.org/10.1101/2021.08.25.457629>; this version posted August 25, 2021. The copyright holder for this preprint (which was not certified by peer review) is the author/funder, who has granted bioRxiv a license to display the preprint in perpetuity. It is made available under aCC-BY 4.0 International license.

Figure

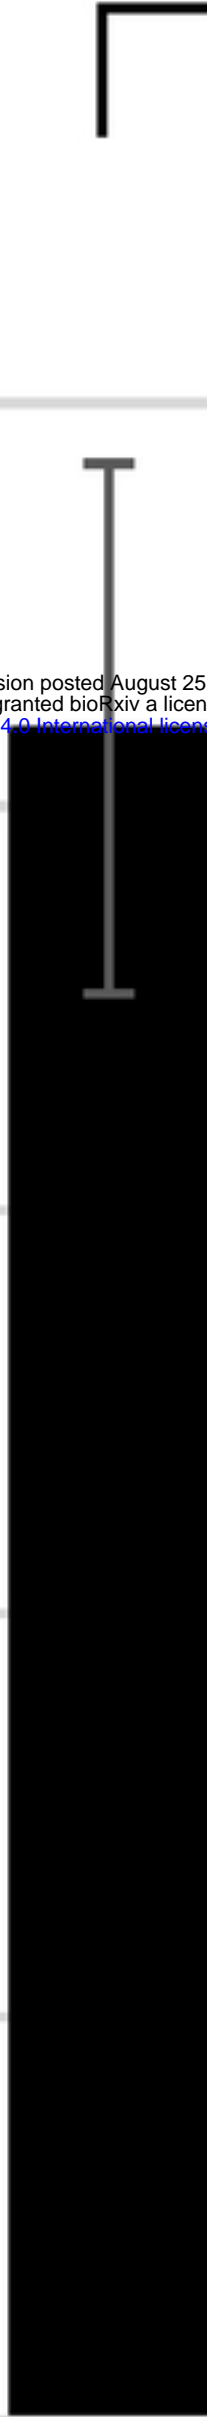

A

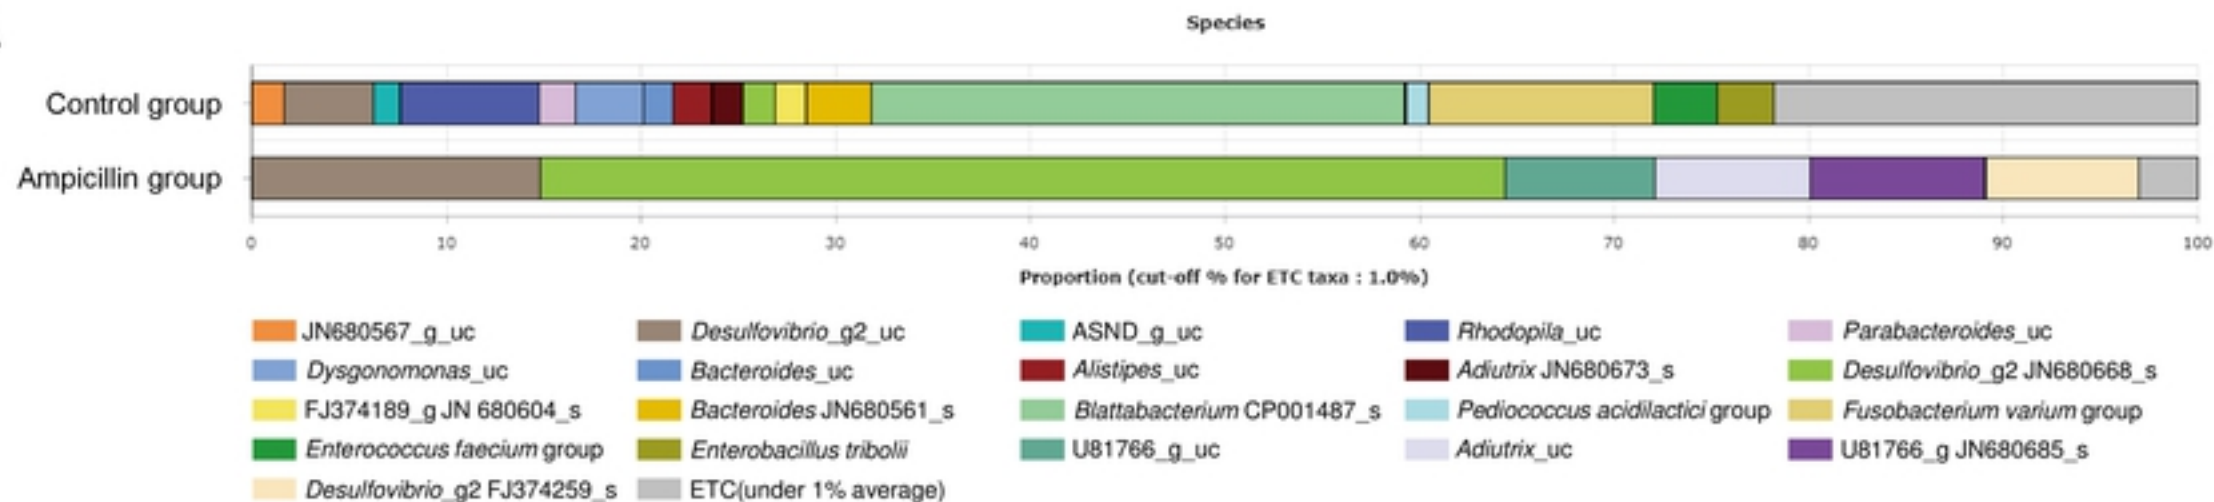

B

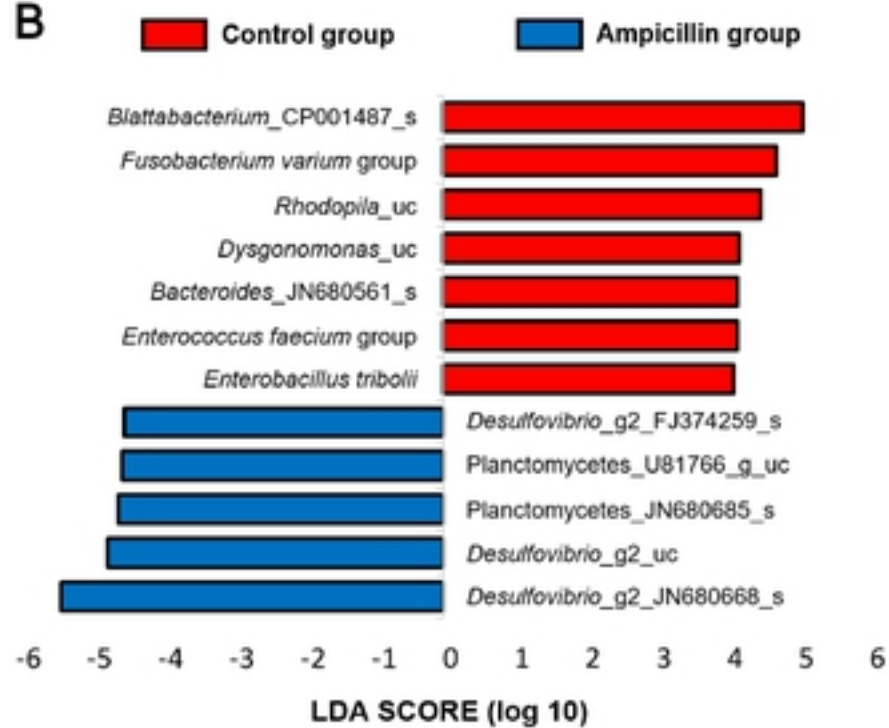

Figure

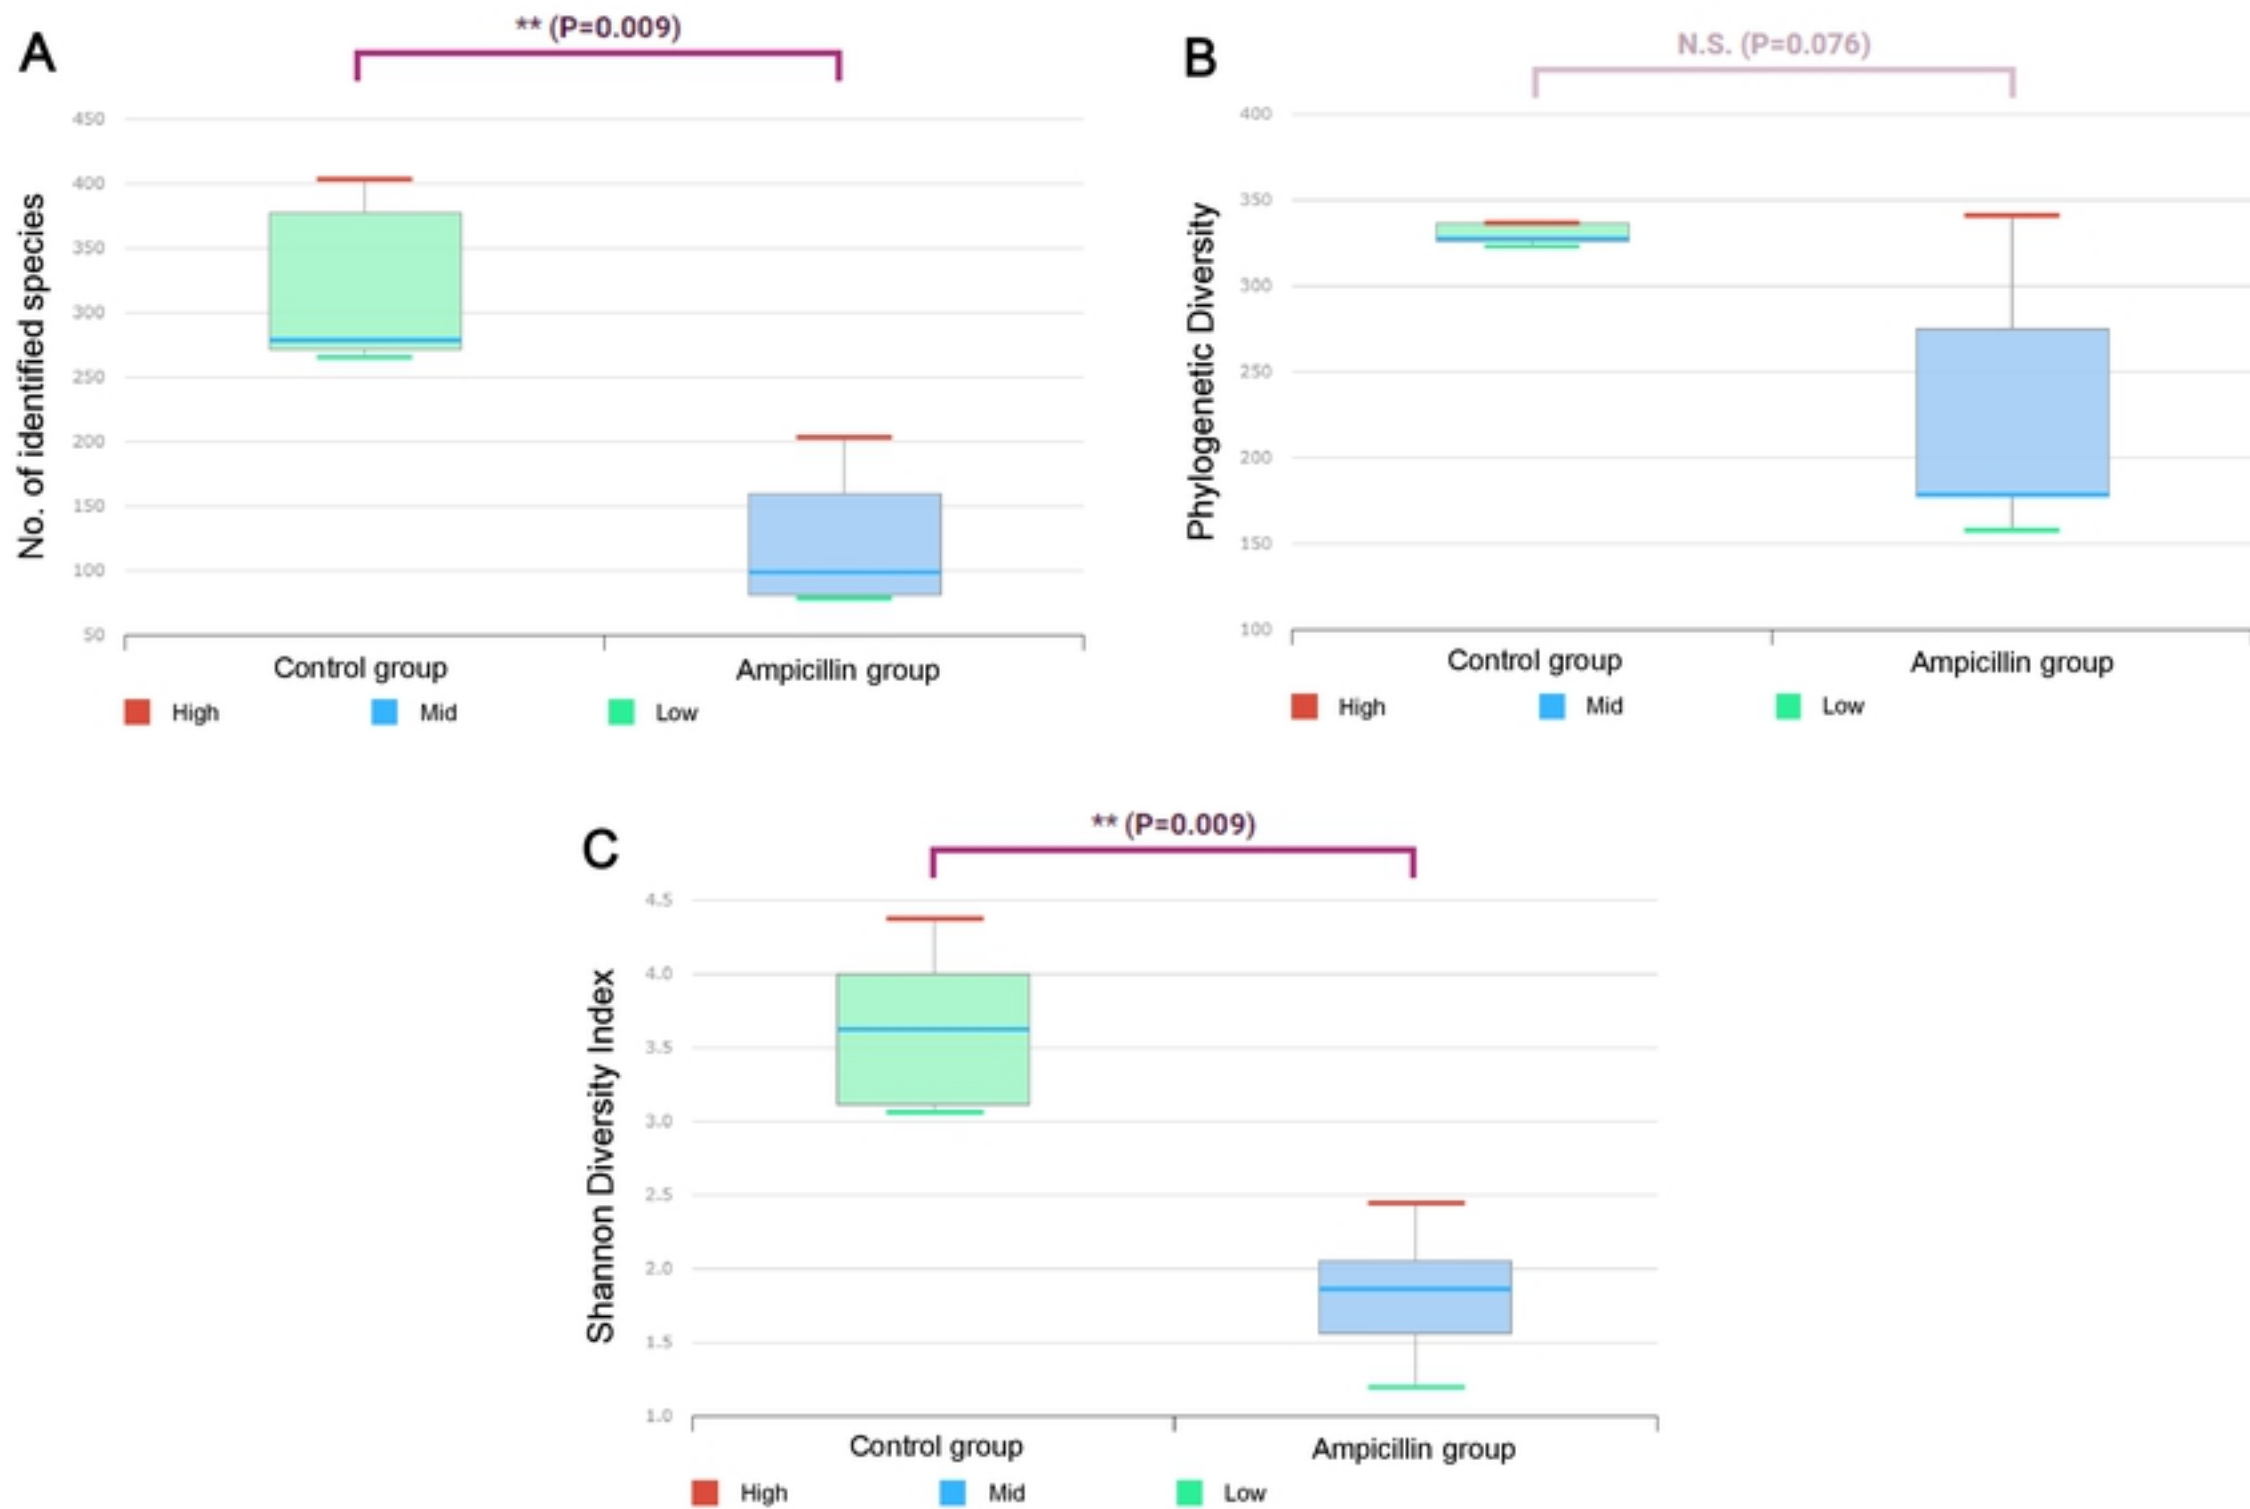

Figure

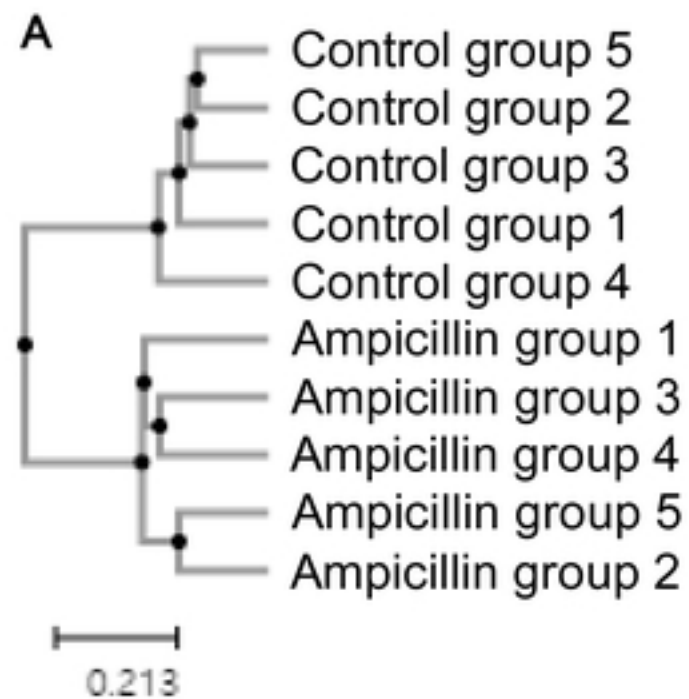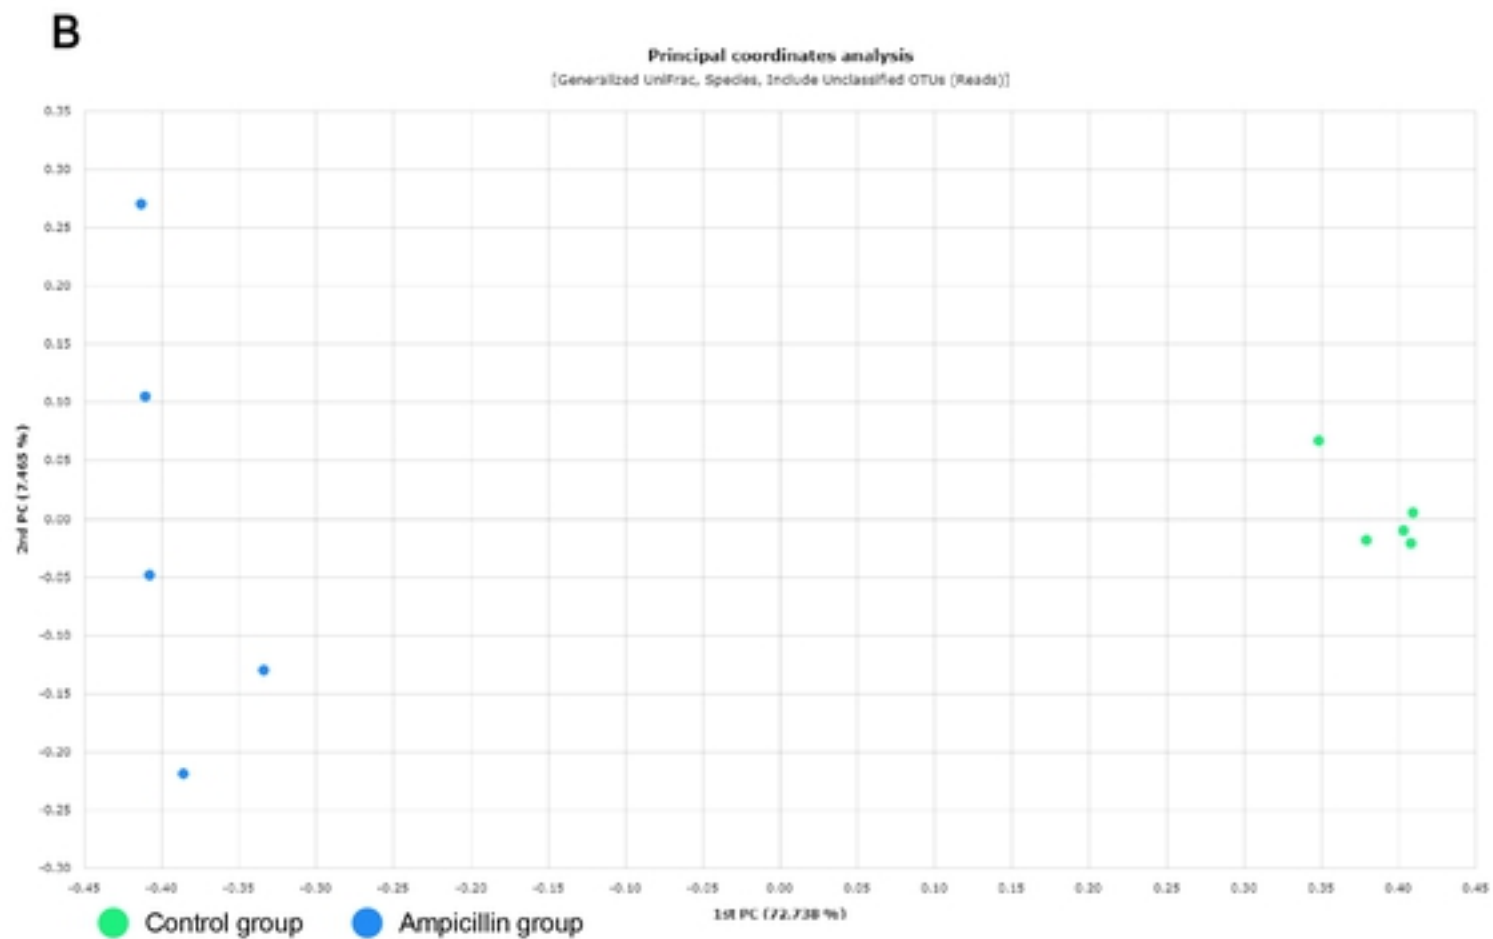

Figure

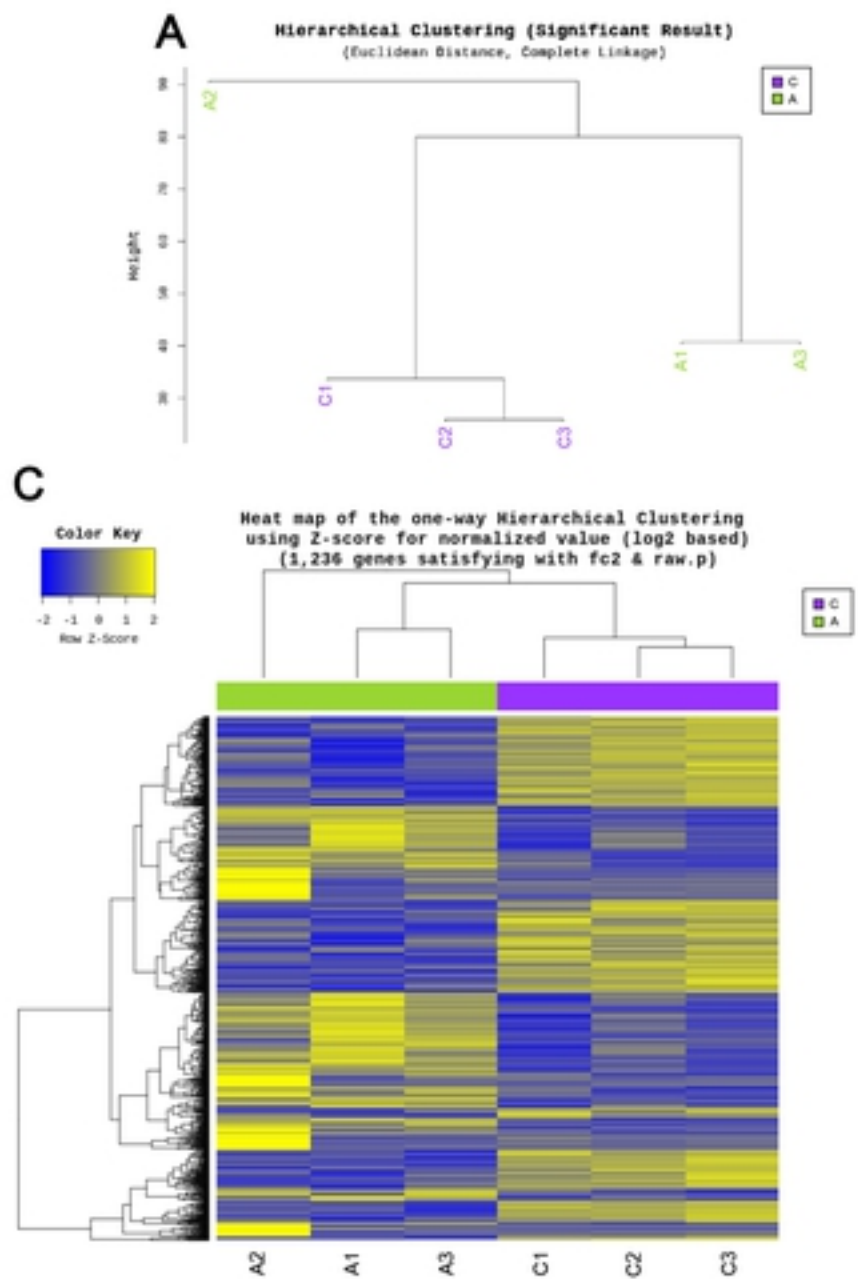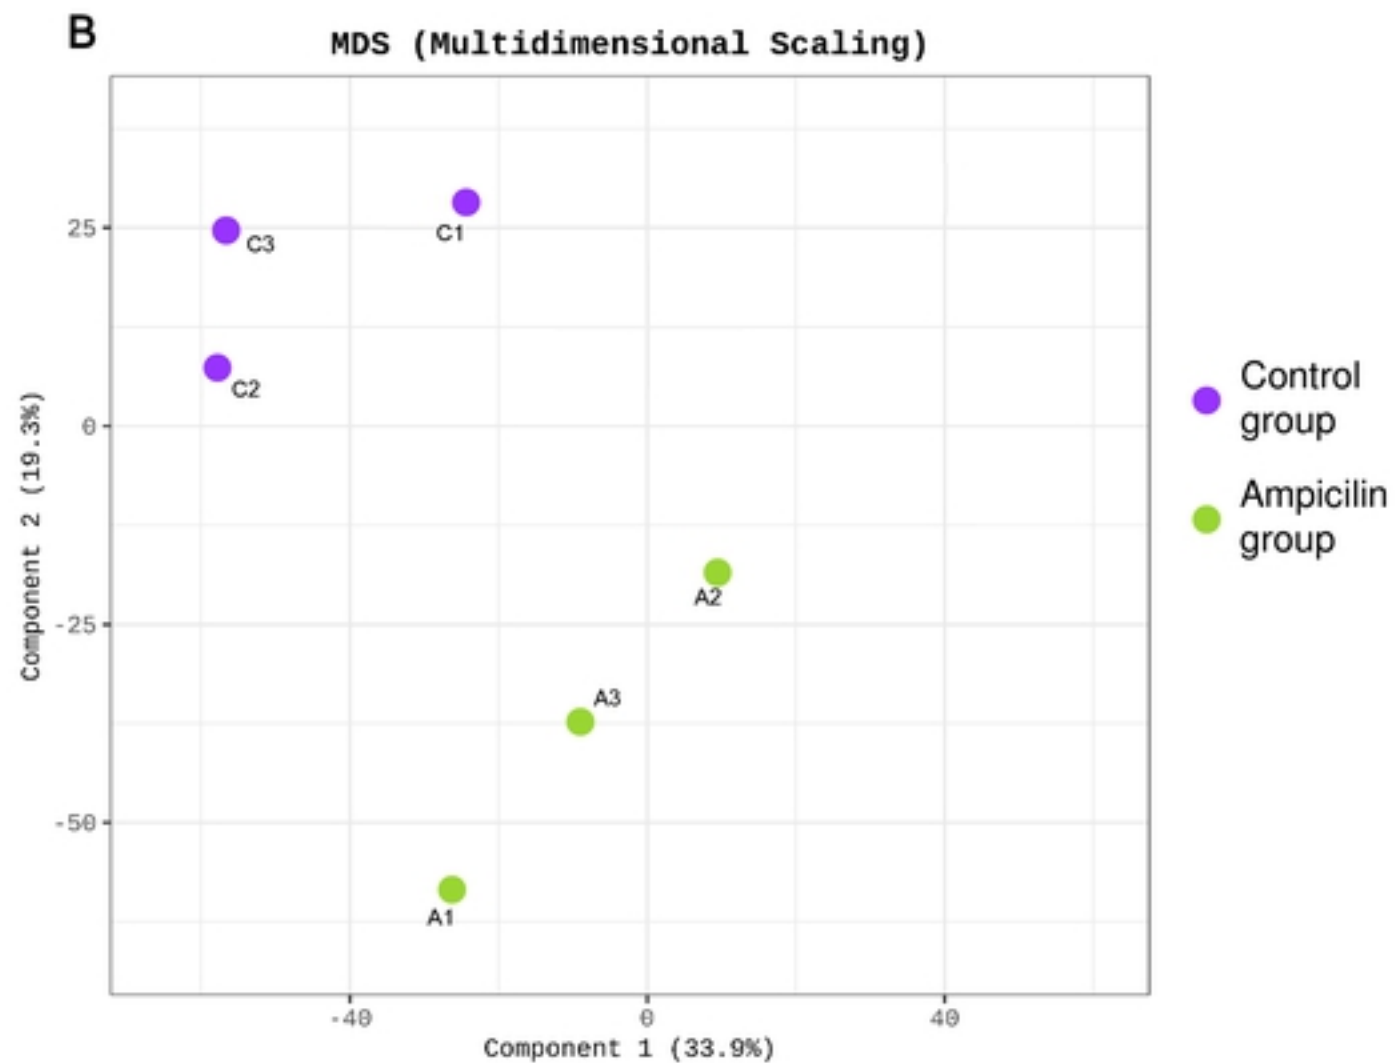

Figure
